# Supplementary material for: Selective Role of TNFα and IL10 in Regulation of Barrier Properties of the Colon in DMH-Induced Tumor and Healthy Rats
Source: MDPI journal article supplement (doi:10.3390/ijms232415610), 2022-12-09
Supplement: s1 [file s1]

## Original images supporting the blot results reported in the article

### *Western blotting of the colon tissues*

From left to right:

the 1st band – control (proximal), the 2nd - TNF $\alpha$  (proximal), the 3rd - IL10 (proximal), the 4th - excluded data\*

the 5th band - control (distal), the 6th - TNF $\alpha$  (distal), the 7th - IL10 (distal), the 8th - excluded data\*

The samples, that are presented in the Figures 3 and 4, marked with  $\uparrow$  below the photos.

\*The excluded data belong to IL6 (4th and 8th bands), they were not included in the material of this article.

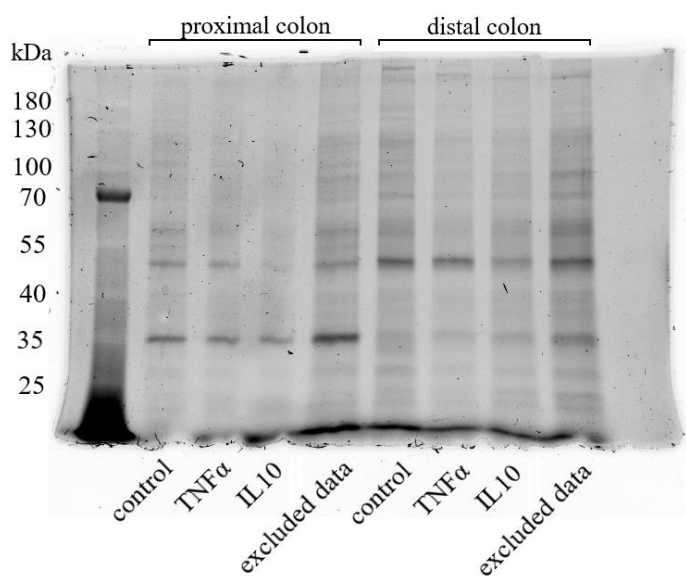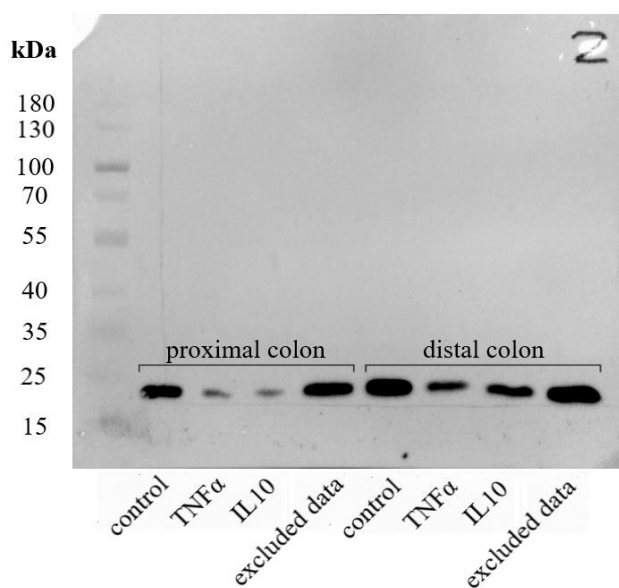

Claudin-1

Stain-free gel

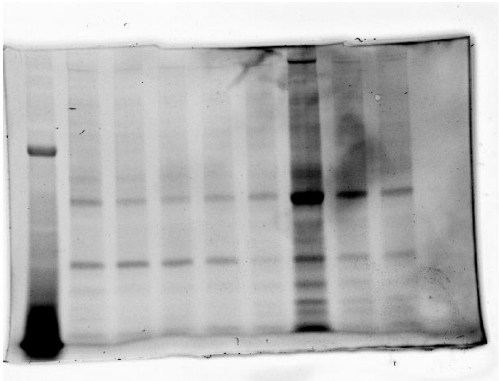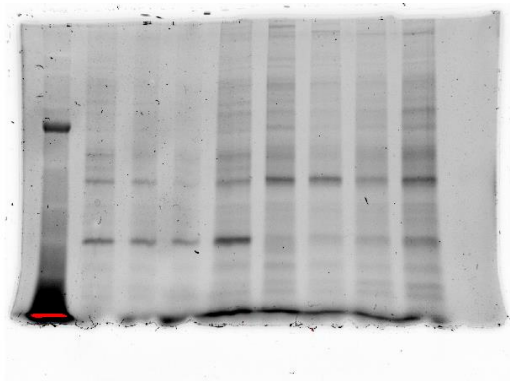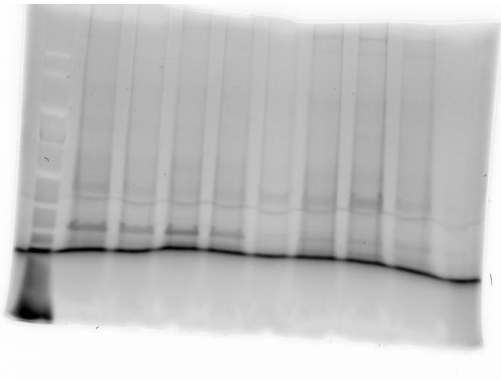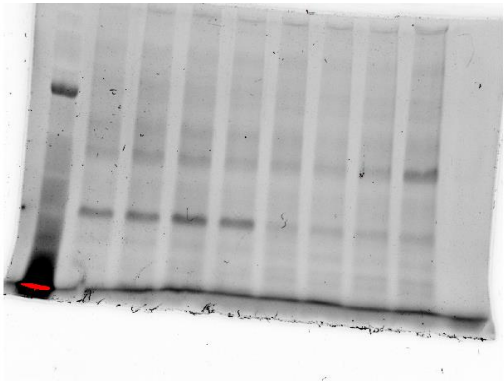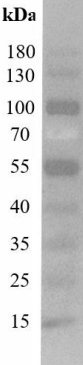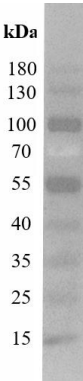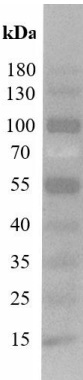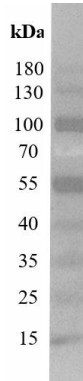

Membrane

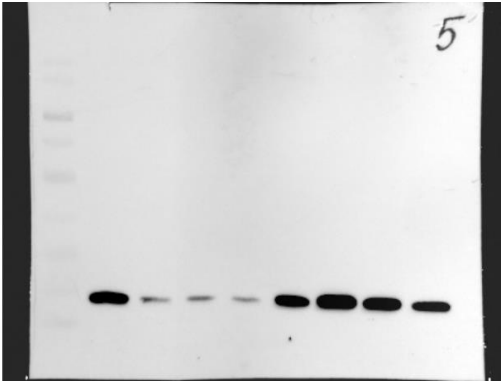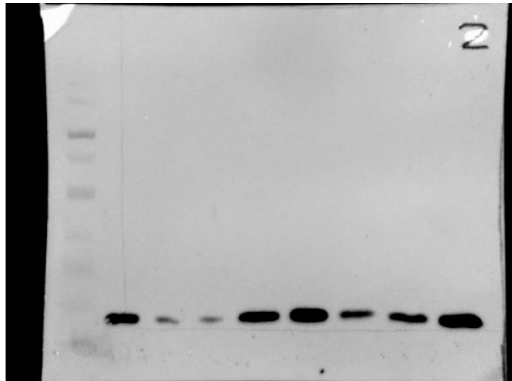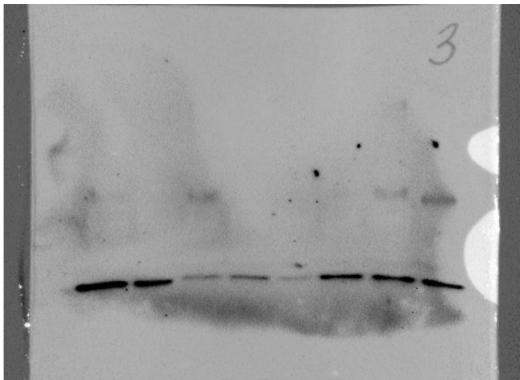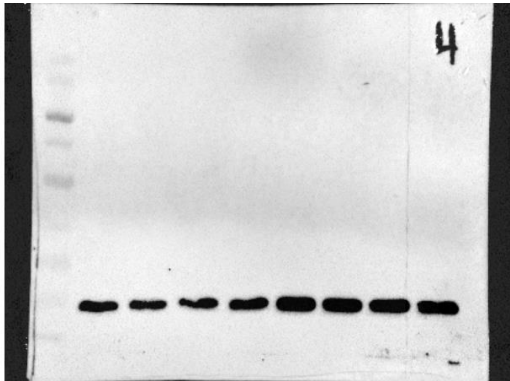

Claudin-2

Stain-free gel

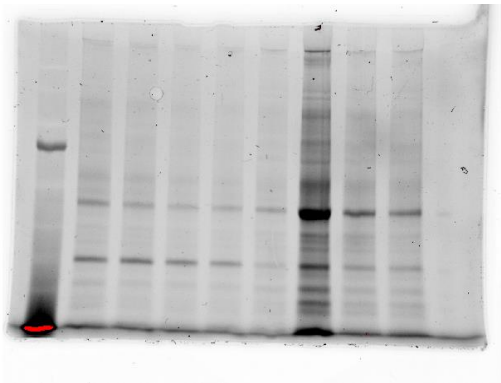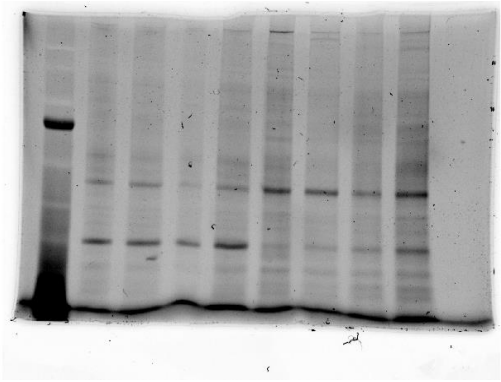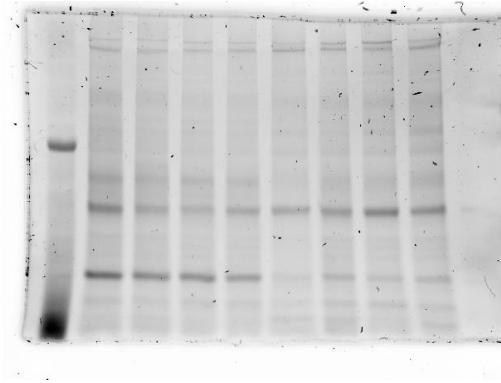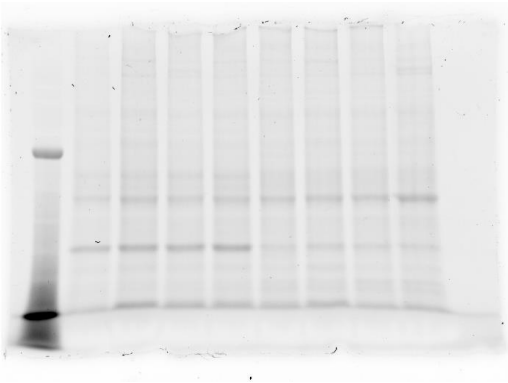

Membrane

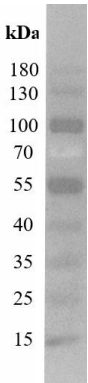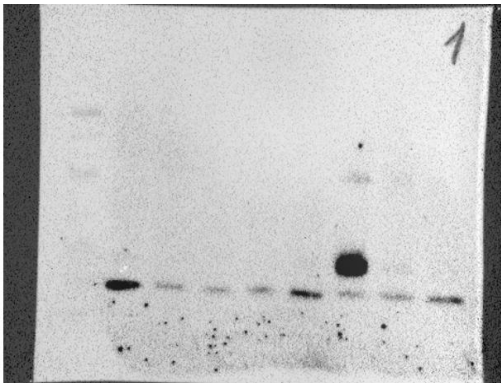

↑ ↑ ↑

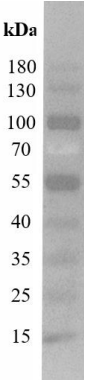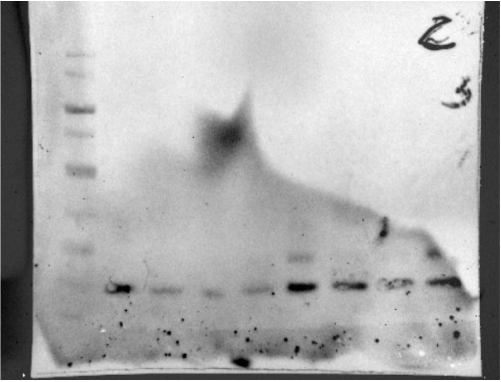

↑ ↑ ↑

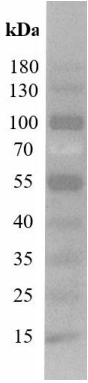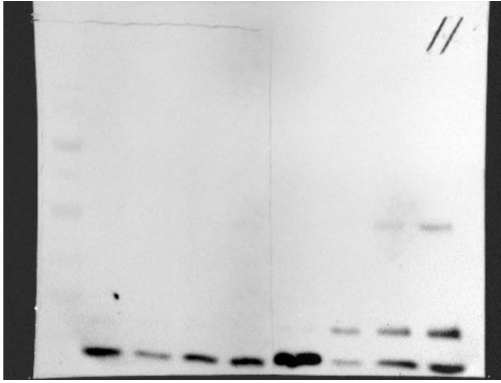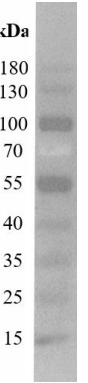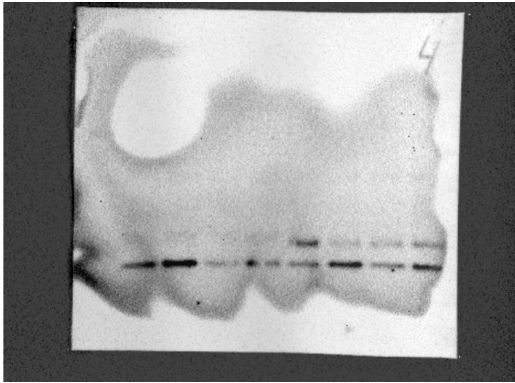

Claudin-3

Stain-free gel

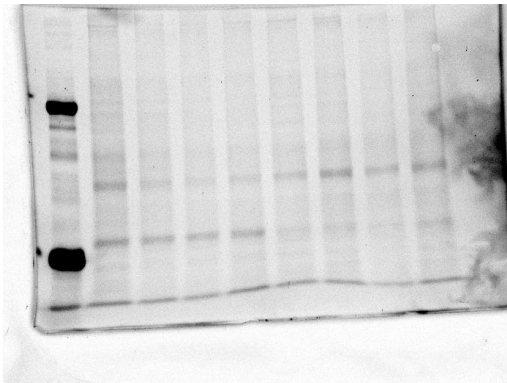

Membrane

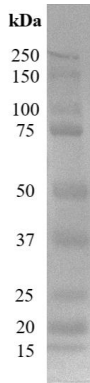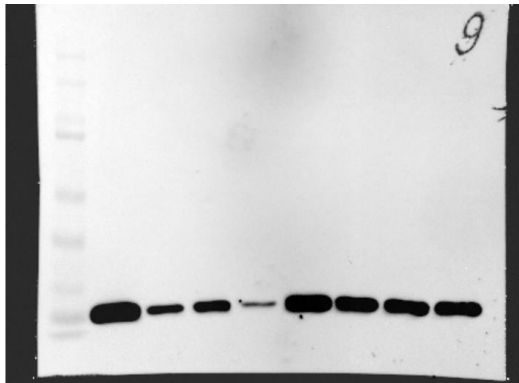

↑ ↑ ↑

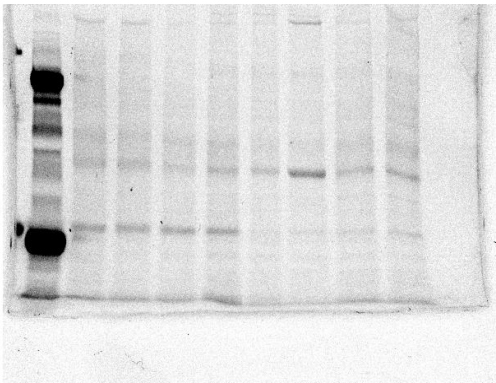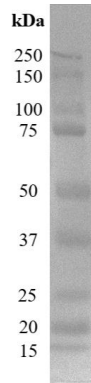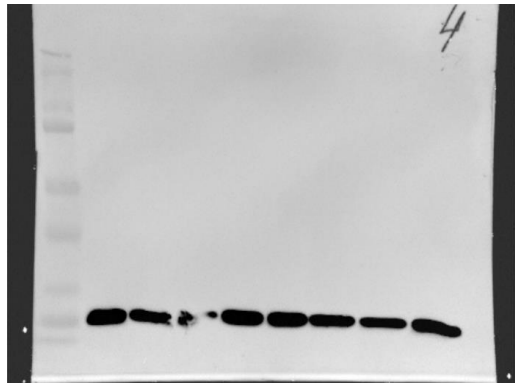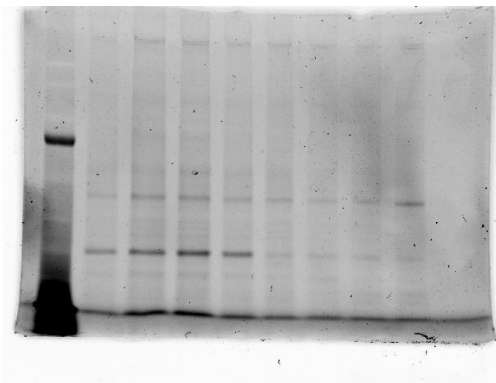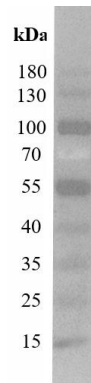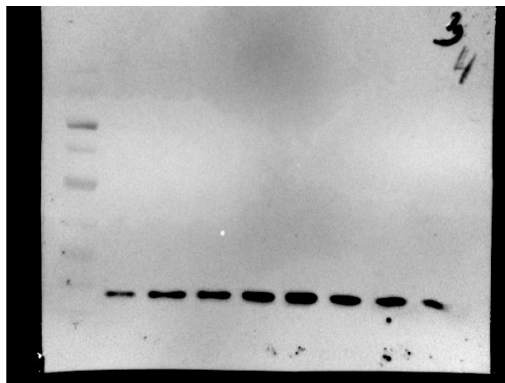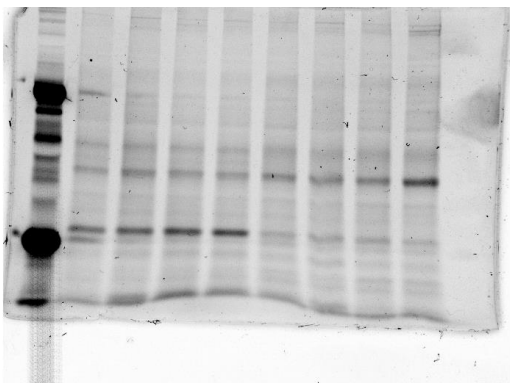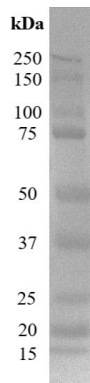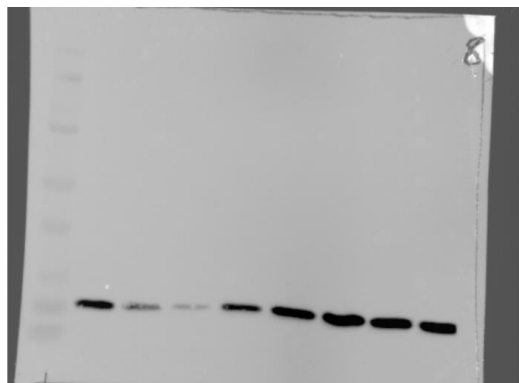

↑ ↑ ↑



Claudin-4

Stain-free gel

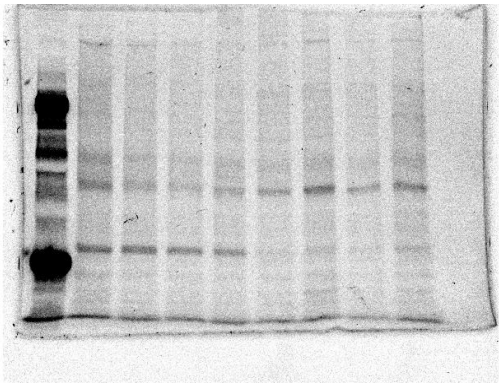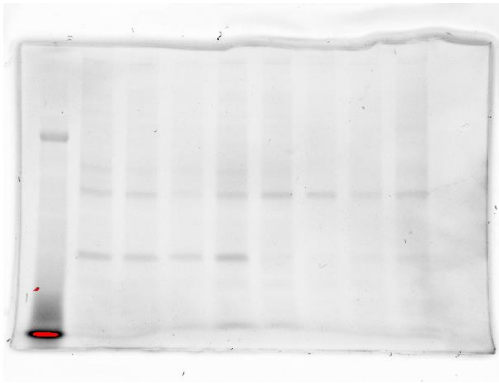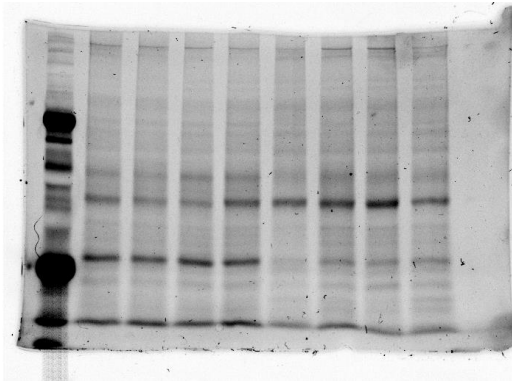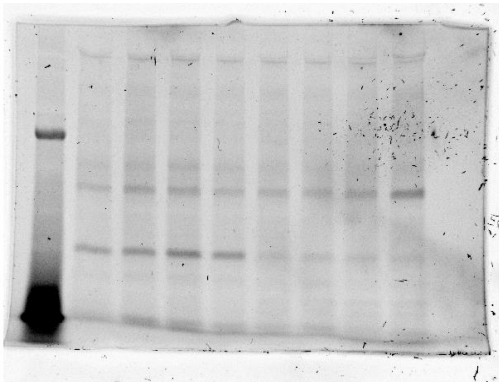

Membrane

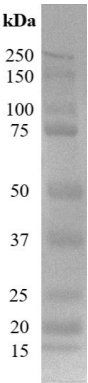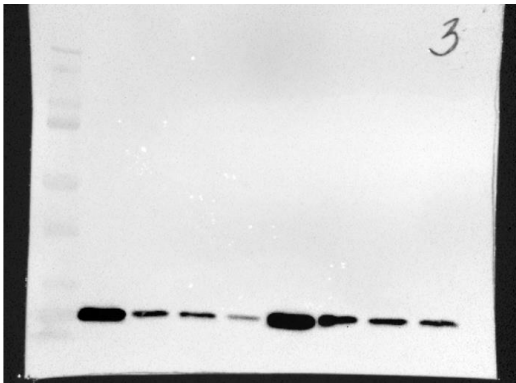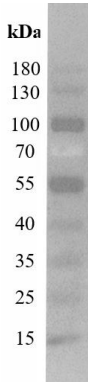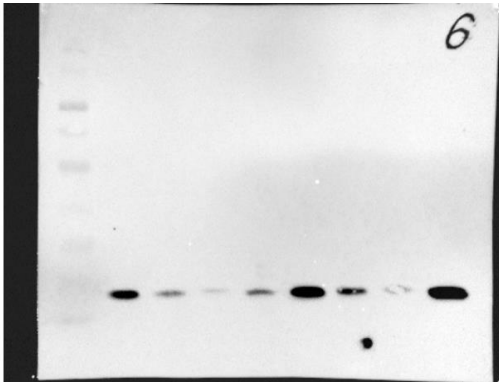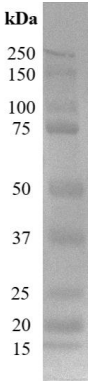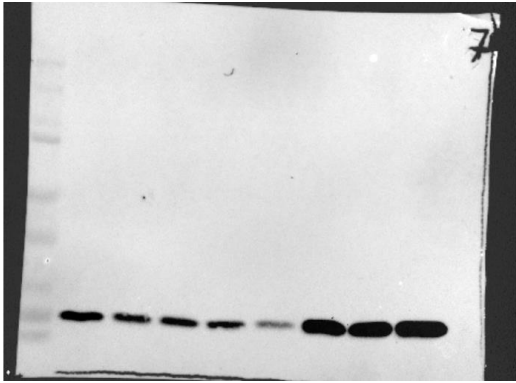

↑ ↑ ↑

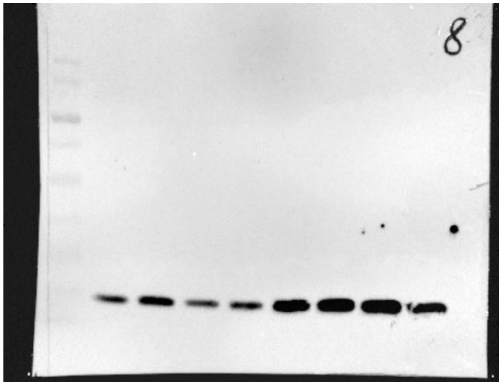

↑ ↑ ↑

Occludin

Stain-free gel

Membrane

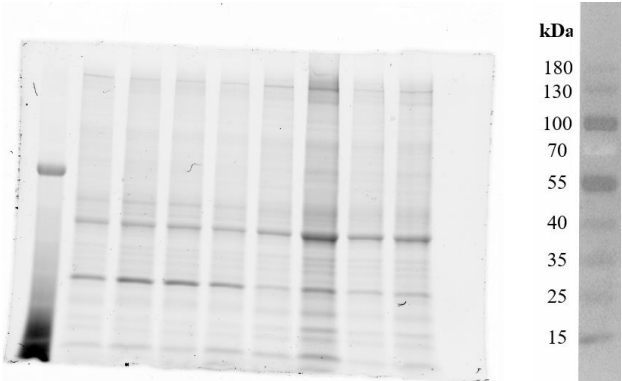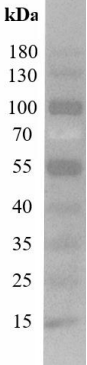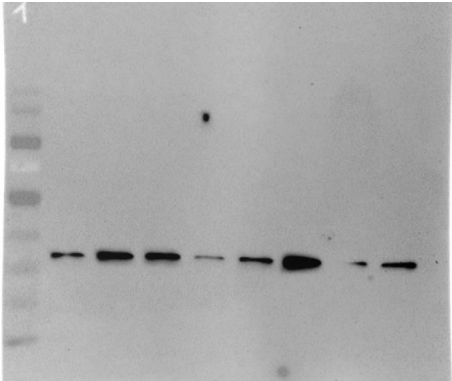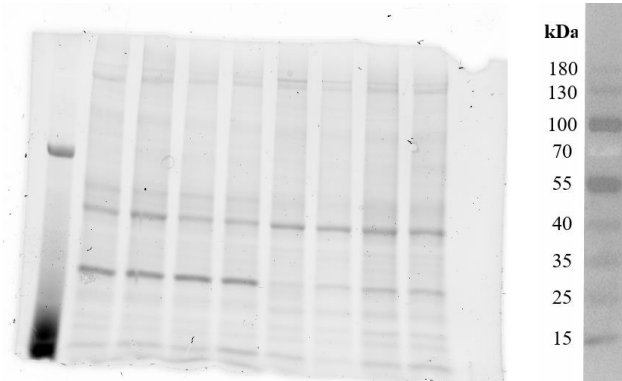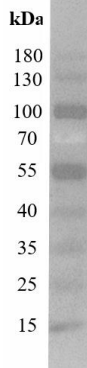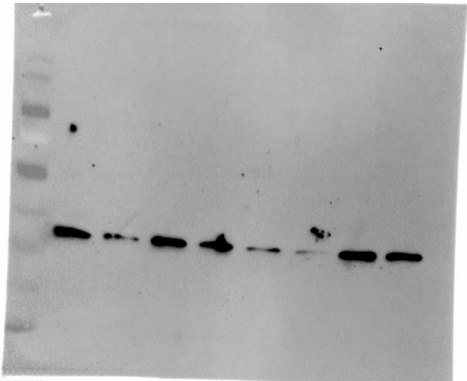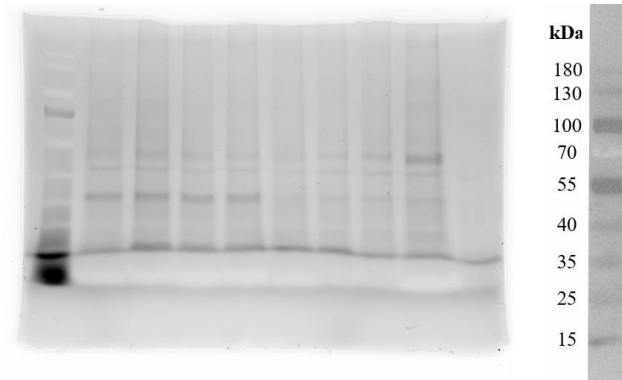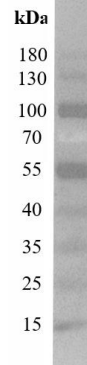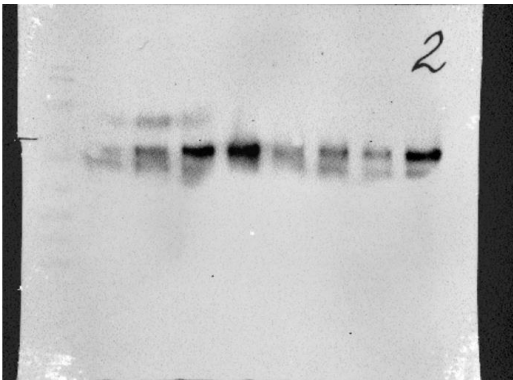

↑ ↑ ↑

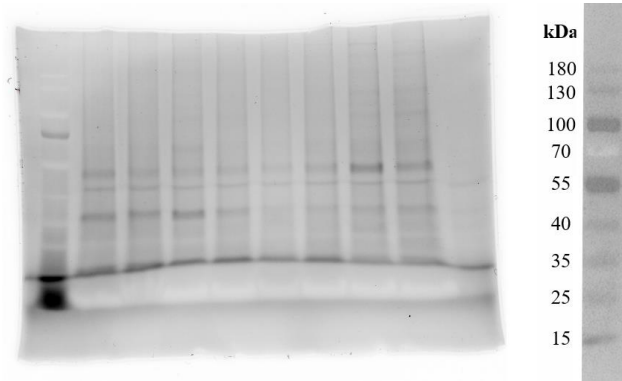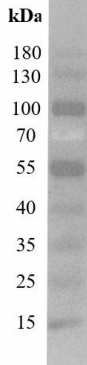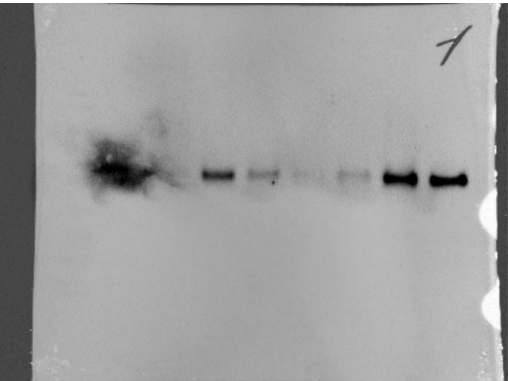

↑ ↑ ↑

Tricellulin

Stain-free gel

Membrane

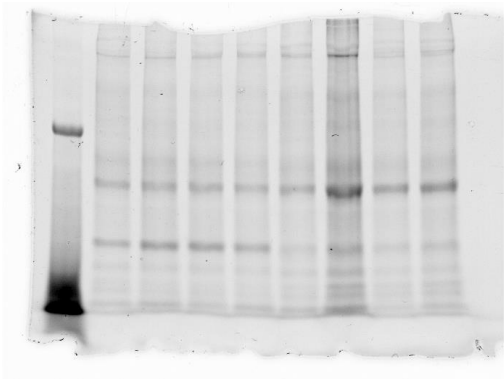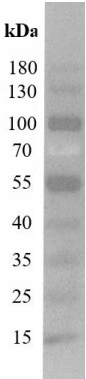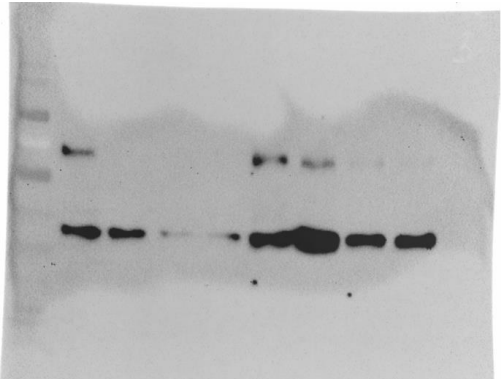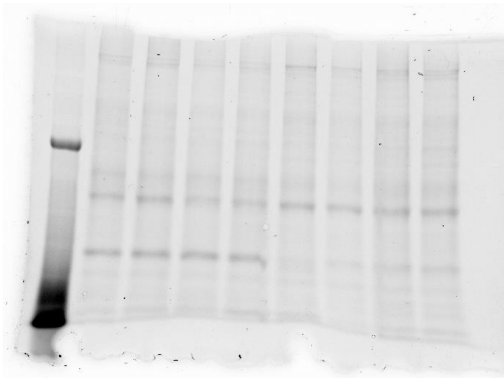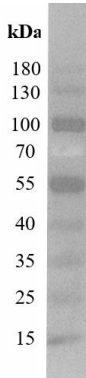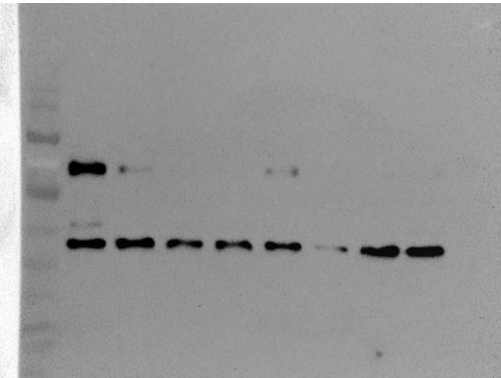

↑ ↑ ↑

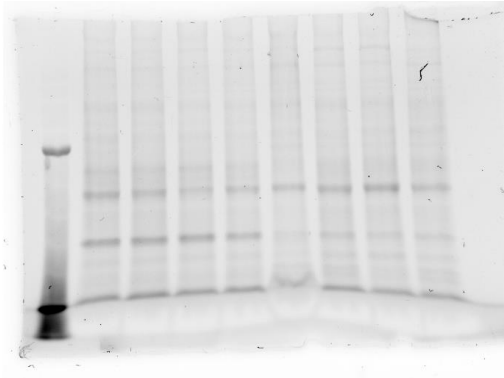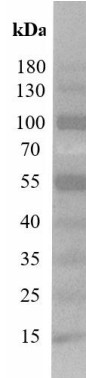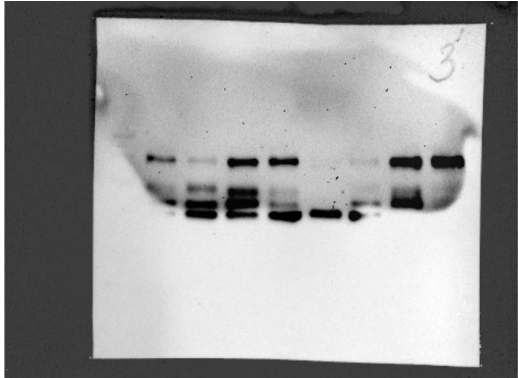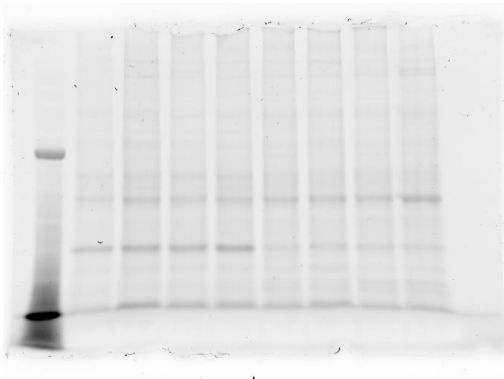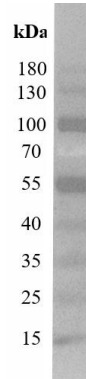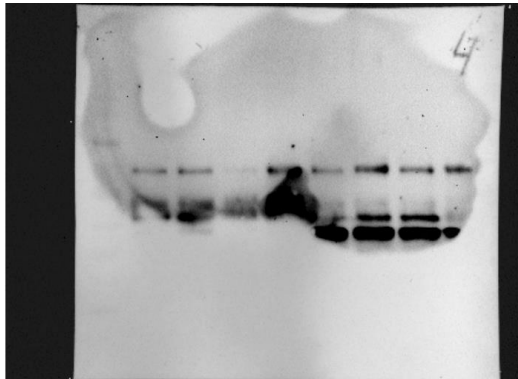

↑ ↑ ↑
